# Supplementary material for: The potential for income improvement and biodiversity conservation via specialty coffee in Ethiopia
Source: PeerJ journal article supplement (doi:10.7717/peerj.10621), 2021-02-09
Supplement: Ethiopia_-_Yayu_Survey_-_PDF_-_English_with_extra_questions.pdf [file Ethiopia_-_Yayu_Survey_-_PDF_-_English_with_extra_questions.pdf]

## Survey Yayu

Q1 Full name and surname \_\_\_\_\_

Q2 Identification number \_\_\_\_\_

Q3 Sex

Male

Female

Q4 Date of birth

Day

Month

Year

Q5 Martital status

Married

Divorced

Single

Widow

Q6 Member of the cooperative since

(Ethiopian Calender Year)

Q7 Highest school grade obtained

No education o

Primary (1-4)

Higher primary (5-8)

High school (9-10)

Preparatory (11-12)

Higher than prepator

Q8 How many people live in your household?  
(Are you responsible for)

Q9 How many children do you have that live in your household?

Q10 Do all children below 15 go to school?

Yes

No

N/A

Q11 Do one or more members of the household have a cell phone that works?

Yes

No

Q12 Phonenumber

Q13 How many hectares of land do you have?

Q14 How many hectares of coffee do you have?

Q15 Is coffee your most important source of income?

Yes

No

Q16 Does your family work on the farm?

Yes

No

Q17 If yes, which one?

Male

Female

Children under 15?

Q18 Do you use paid daily labour?

Yes

No

Q19 If yes, which one?

Male

Female

Children under 15?

Q20 How many kilo of red cherries did you harvest in 2015/16

Kilo

Q21 To whom did you sell the red cherries

Cooperative

Kilo

Average price?

Other

Kilo

Average price?

Q22 How many kilo's did you sundry?

Kilo

Q23 How do you dry your cherries?

Drying bed

On the ground

On the tree

Q24 How many coffee trees do you have?

Q25 Do you grow another crop

Yes

No

Q26 Does your coffee has a problem?

Yes

No

Specify

Q27 Do you use chemical fertilizer (agrochemicals)

 Yes No

Q28 Did the cooperative promotion visit your coffee farm

Q29 Age (in years) of your oldest coffee tree

 Years

Q30 Age (in years) of your youngest coffee tree

 Years

Q31 Do you prune your coffee trees

 Yes No

Q32 Where did you get your seedlings from

Q33 What variety do you grow

Q34 Which date (dd/mm/yy) did your harvest start

Q35 How do you transport the coffee

Q36 **Surveyor name**

Q25

**Date**

|                      |                      |                      |
|----------------------|----------------------|----------------------|
| <input type="text"/> | <input type="text"/> | <input type="text"/> |
|----------------------|----------------------|----------------------|

**Day**

**Month**

**Year**

**Signature**

**Signature of farmer**
