# Supplementary material for: The potential for income improvement and biodiversity conservation via specialty coffee in Ethiopia
Source: PeerJ. 2021 Feb 9;9:e10621. doi: 10.7717/peerj.10621 (PMC7879952; doi:10.7717/peerj.10621)
Supplement: Supplemental Information 1 [file peerj-09-10621-s001.xlsx]

## Sheet: Sheet4
Column1
Mean	56.3906
Standard Error	0.918066
Median	56
Mode	46
Standard Deviation	14.6891
Sample Variance	215.768
Kurtosis	0.611106
Skewness	0.1233
Range	111
Minimum	0
Maximum	111
Sum	14436
Count	256
Confidence Level(95.0%)	1.80796

## Sheet: Sheet5
Column1
Mean	56.3906
Standard Error	0.918066
Median	56
Mode	46
Standard Deviation	14.6891
Sample Variance	215.768
Kurtosis	0.611106
Skewness	0.1233
Range	111
Minimum	0
Maximum	111
Sum	14436
Count	256
Confidence Level(95.0%)	1.80796

## Sheet: All
Number	Name	Gender	Age	Cooperative	Cooperative Year	Education	Family members	School under 15	Phone	13. Total farm area in hectares	14. Total coffee area in hectares	15. Is coffee your main crop?	16. Do you use family labour	17. Gender of family labour	18. Do you use hired labour?	19. Gender of hired labour	20. how many kilo's of fresh cherries did you harvest in 2008?	21. Sold to cooperative	22. How many kilo did you sell to the cooperative?	23. At What price?	24. How many kilo did you sundry?	Kilo Equivalent green from washed cherry (5.5)	KIlo Equivalent Green from sundried cherry (2)	Kilo Total Green (sum of both)	% Sundried of total harvest	Yield per hectare in green equivalent
1	Respondent - 1	Male	71	Wutete	14	None	5	yes	no	3	3	yes	yes	m/f	no	n/a	10	no	n/a	n/a	7	1.81818	3.5	5.3	0.660377	1.76667
2	Respondent - 2	Female	32	Wutete	13	4	5	yes	no	2	2	yes	yes	m/f	yes	m/f		n/a	n/a	n/a
3	Respondent - 3	Female	48	Wutete	19	8	2	yes	yes	2	2	yes	no	n/a	yes	m/f	10	no	n/a	n/a	0	1.81818	0	1.8	0	0.9
4	Respondent - 4	Male	44	Wutete	15	8	7	yes	no	3	2	yes	yes	f	yes	m/f	480	yes	280	6	480	87.2727	240	326.4	0.735294	163.2
5	Respondent - 5	Male	66	Wutete	20	4	9	no	no	7	4	yes	yes	m/f	yes	m/f	1177	yes	1177	8	480	214	240	451.86	0.531138	112.965
6	Respondent - 6	Male	73	Wutete	42	8	6	yes	no	5	2.5	yes	yes	f	yes	m/f	550	yes	550	8	100	100	50	149	0.33557	59.6
7	Respondent - 7	Male	67	Wutete	19	8	8	yes	yes	4	3	yes	yes	m/f	yes	m/f	594	yes	594	8	300	108	150	256.92	0.583839	85.64
8	Respondent - 8	Male	75	Wutete	14	4	6	yes	no	2.5	1	yes	yes	f	yes	m/f	713	yes	173	6	180	129.636	90	218.34	0.412201	218.34
9	Respondent - 9	Male	63	Wutete	14	4	9	yes	yes	2	1.5	yes	yes	f	yes	m/f	96	yes	96	6	0	17.4545	0	17.28	0	11.52
10	Respondent - 10	Male		Wutete	14	12	9	yes	yes	2	1	yes	yes	m/f	yes	m/f	1200	yes	1200	6	600	218.182	300	516	0.581395	516
11	Respondent - 11	Female	45	Wutete	14	8	6	yes	yes	4.5	4	yes	yes	m/f	yes	m/f	1100	yes	900	6.5	100	200	50	248	0.201613	62
12	Respondent - 12	Male	74	Wutete	14	8	7	yes	yes	4.5	3	yes	yes	m/f	yes	m/f	733	yes	658		150	133.273	75	206.94	0.362424	68.98
13	Respondent - 13	Male	67	Wutete	14	None	8	yes	no	5	1.5	yes	yes	m/f	yes	m/f	662	yes	662	6	260	120.364	130	249.16	0.521753	166.107
14	Respondent - 14	Male	82	Wutete	14	4	7	yes	no	2.5	2	yes	yes	m/f	yes	m/f	350	yes	350	7	60	63.6364	30	93	0.322581	46.5
15	Respondent - 15	Male	75	Wutete	14	4	6	yes	no	2.5	1	yes	yes	f	yes	m/f	173	yes	173	6	713	31.4545	356.5	387.64	0.919668	387.64
16	Respondent - 16	Male	46	Wutete	15	8	15	yes	yes	3.6	3.6	yes	yes	m/f/c	yes	m/f	928	yes	928	5	330	168.727	165	332.04	0.496928	92.2333
17	Respondent - 17	Male	77	Wutete	17	4	10	yes	no	10	8	yes	yes	m/f	no	n/a	800	yes	800	7	60	145.455	30	174	0.172414	21.75
18	Respondent - 18	Male		Wutete	17	8	6	yes	yes	3	1	yes	yes	m/c	yes	m/f	520	yes	520	6	300	94.5455	150	243.6	0.615764	243.6
19	Respondent - 19	Female	44	Wutete	11	8	5	yes	yes	1.5	1	yes	yes	m/f	yes	m/f	1000	yes	1000	6	500	181.818	250	430	0.581395	430
20	Respondent - 20	Male	52	Wutete	13	8	7	yes	yes	2	1	yes	yes	f	no	n/a		n/a	n/a	n/a
21	Respondent - 21	Male	57	Wutete	14	None	10	yes	yes	1	1	yes	yes	m/f	yes	f	320	yes	320	6	65	58.1818	32.5	90.1	0.36071	90.1
22	Respondent - 22	Male	46	Wutete	8	4	4	yes	yes	2	2	yes	yes	f	yes	m/f	100	yes	40	6	200	18.1818	100	118	0.847458	59
23	Respondent - 23	Male	47	Wutete	17	4	6	yes	yes	1	1	yes	yes	m/f	yes	m/f	70	yes	70	6	50	12.7273	25	37.6	0.664894	37.6
24	Respondent - 24	Male	60	Wutete	12	Above	4	yes	yes	2	2	yes	yes	m/f	yes	m/f/c	1000	yes	1000	5	1000	181.818	500	680	0.735294	340
25	Respondent - 25	Male	47	Wutete	11	Above	3	yes	yes	2	2	yes	yes	c	no	n/a	200	no	0	0	4000	36.3636	2000	2036	0.982318	1018
26	Respondent - 26	Male	51	Wutete		None	3	yes	yes	5	5	yes	yes	f	yes	m/f	300	yes	180		300	54.5455	150	204	0.735294	40.8
27	Respondent - 27	Male	51	Wutete	16	8	8	yes	yes	1	0.5	yes	yes	m	yes	m	1000	yes	135	5	200	181.818	100	280	0.357143	560
28	Respondent - 28	Male	52	Wutete	11	8	9	yes	yes	2.5	1.5	yes	yes	f	yes	m	300	no	0	n/a	250	54.5455	125	179	0.698324	119.333
29	Respondent - 29	Male	59	Wutete	19	4	6	yes	yes	2.5	2	yes	yes	m/f	yes	m	60	yes	60	5	120	10.9091	60	70.8	0.847458	35.4
30	Respondent - 30	Female	61	Wutete	19	None	7	n/a	no	2	1	yes	yes	f	yes	m/f	600	yes	600		200	109.091	100	208	0.480769	208
31	Respondent - 31	Male	51	Wutete	14	10	9	yes	yes	4	3	yes	yes	m/c	yes	f	1023	yes	1023	7	1300	186	650	834.14	0.779246	278.047
32	Respondent - 32	Male	48	Wutete	29	8	4	no	yes	4	3	yes	yes	f	yes	m	1244	yes	1244	5	0	226.182	0	223.92	0	74.64
33	Respondent - 33	Female	71	Wutete	19	None	6	no	no	1	1	yes	yes	m/f	no	n/a	60	yes	20	6	0	10.9091	0	10.8	0	10.8
34	Respondent - 34	Male	47	Wutete	19	8	4	yes	no	1	0.5	yes	yes	m/f	no	n/a	300	yes	300	6	20	54.5455	10	64	0.15625	128
35	Respondent - 35	Male	51	Wutete	14	8	6	yes	no	1	0.5	yes	yes	m/f	yes	m/f	206	yes	206	6	0	37.4545	0	37.08	0	74.16
36	Respondent - 36	Female	36	Wutete	19	8	3	yes	yes	1	1	yes	yes	m/f	yes	m/f	20	yes	20	7	300	3.63636	150	153.6	0.976562	153.6
37	Respondent - 37	Male	80	Wutete	19	4	13	yes	yes	3	1	yes	yes	f	yes	m/f	100	yes	100	6	200	18.1818	100	118	0.847458	118
38	Respondent - 38	Male	44	Wutete	9	8	6	yes	yes	3	2	yes	yes	f/c	yes	m/f	0	n/a	n/a	n/a	50	0	25	25	1	12.5
39	Respondent - 39	Male	71	Wutete	13	8	9	yes	no	2	1	yes	yes	m/f	yes	m/f		n/a	n/a	n/a						0
40	Respondent - 40	Male	50	Wutete	17	10	6	yes	yes	2.5	2	yes	yes	m/f	yes	m/f	1100	yes	1100	8	800	200	400	598	0.668896	299
41	Respondent - 41	Male	47	Wutete	15	4	5	yes	yes	5	5	yes	yes	m/f/c	yes	m/f	1454	yes	1454	5	480	264.364	240	501.72	0.478354	100.344
42	Respondent - 42	Male	66	Wutete	19	10	8	yes	yes	1.5	1.5	yes	yes	m/f/c	yes	m	0	n/a	n/a	n/a	100	0	50	50	1	33.3333
43	Respondent - 43	Male	86	Wutete	19	None	5	no	no	1	1	yes	yes	m	yes	f	600	yes	600	5	100	109.091	50	158	0.316456	158
44	Respondent - 44	Male	51	Wutete	16	12	6	yes	yes	1.5	1.5	yes	yes	m/f/c	yes	m/f	0	n/a	n/a	n/a	100	0	50	50	1	33.3333
45	Respondent - 45	Male	47	Wutete	19	4	10	yes	yes	2	2	yes	yes	m/f	yes	m/f		n/a	n/a	n/a
46	Respondent - 46	Male	66	Wutete	17	None	12	yes	yes	2	1	no	yes	m/f	yes	m/f	800	yes	800	6	0	145.455	0	144	0	144
47	Respondent - 47	Male	80	Wutete	19	4	9	no	yes	4	2.5	yes	no	n/a	yes	m/f	307	yes	307	6	180	55.8182	90	145.26	0.619579	58.104
48	Respondent - 48	Male	47	Wutete	13	10	5	yes	yes	1.5	0.75	yes	yes	f	yes	m/f	600	yes	600	6	70	109.091	35	143	0.244755	190.667
49	Respondent - 49	Male	66	Wutete	19	None	10	yes	yes	4	1.5	no	yes	m	yes	m	0	n/a	n/a	n/a	200	0	100	100	1	66.6667
50	Respondent - 50	Male	66	Wutete	19	4	10	yes	yes	3.5	1.5	yes	yes	m/f	yes	m/f	108	yes	108	6	360	19.6364	180	199.44	0.902527	132.96
51	Respondent - 51	Male	50	Wutete	14	10	12	yes	yes	4	2	yes	yes	m/f	yes	m/f	1300	yes	1300	8	600	236.364	300	534	0.561798	267
52	Respondent - 52	Male	58	Wutete	14	4	8	yes	yes	2.25	1	yes	yes	m/f/c	yes	m/f	350	yes	350	8	100	63.6364	50	113	0.442478	113
53	Respondent - 53	Male	47	Wutete	9	8	5	yes	yes	1.5	1	yes	no	n/a	yes	m/f	0	n/a	n/a	n/a	600	0	300	300	1	300
54	Respondent - 54	Male	38	Wutete	9	12	5	yes	yes	1	1	yes	yes	f	yes	m/f		n/a	n/a	n/a
55	Respondent - 55	Male	68	Wutete	19	12	8	n/a	yes	8	6	yes	yes	f	yes	m/f	1870	yes	1870	7	400	340	200	536.6	0.372717	89.4333
56	Respondent - 56	Female	66	Wutete	15	None	9	yes	no	2.5	1.5	yes	yes	m	no	n/a	282	yes	282	7	100	51.2727	50	100.76	0.496229	67.1733
57	Respondent - 57	Male	56	Wutete	19	4	6	yes	yes	1	1	yes	yes	m/f/c	yes	m/f	100	yes	100	6	50	18.1818	25	43	0.581395	43
58	Respondent - 58	Male	66	Wutete	19	8	3	yes	yes	2	1	yes	yes	m/f	yes	m/f		n/a	n/a	n/a
59	Respondent - 59	Male	40	Wutete	9	8	4	yes	no	2	2	yes	yes	m/f	yes	m/f		n/a	n/a	n/a
60	Respondent - 60	Male	46	Wutete	13	10	4	yes	yes	3	2.5	yes	yes	f	yes	m/f	139	yes	139	6	275	25.2727	137.5	162.52	0.84605	65.008
61	Respondent - 61	Male	66	Wutete	8	None	8	yes	yes	1	1	yes	yes	m/f	yes	m/f		n/a	n/a	n/a
62	Respondent - 62	Male	77	Wutete	47	8	9	yes	yes	2	2	no	yes	m	yes	m	300	yes	300	7	280	54.5455	140	194	0.721649	97
63	Respondent - 63	Male	59	Wutete	17	None	6	yes	no	1	1	yes	yes	m/f	no	n/a	20	yes	20	5		3.63636		3.6	0	3.6
64	Respondent - 64	Male	61	Wutete	17	8	9	yes	no	1	1	yes	yes	m/f/c	no	n/a	50	yes	50	5	50	9.09091	25	34	0.735294	34
65	Respondent - 65	Male	58	Wutete	17	4	9	yes	no	1.5	1.5	yes	yes	m/f/c	no	n/a	150	yes	150	6	60	27.2727	30	57	0.526316	38
66	Respondent - 66	Male	72	Wutete	27	None	3	no	no	2	2	yes	yes	f	yes	f	175	yes	175		180	31.8182	90	121.5	0.740741	60.75
67	Respondent - 67	Male	66	Wutete	27	4	9	yes	no	0.75	0.75	yes	yes	m/f/c	no	n/a	365	yes	365	6	120	66.3636	60	125.7	0.477327	167.6
68	Respondent - 68	Male	61	Wutete	46	8	9	yes	yes	1	1	yes	yes	m/f	yes	m/f/c	40	yes	40	5	60	7.27273	30	37.2	0.806452	37.2
69	Respondent - 69	Male	76	Wutete	36	None	7	yes	no	1.5	1.5	yes	yes	m/f/c	yes	m/f	50	yes	50	5	60	9.09091	30	39	0.769231	26
70	Respondent - 70	Male	54	Wutete	19	10	8	yes	yes	6	5	yes	yes	m/f/c	yes	m/f	300	yes	180	5	120	54.5455	60	114	0.526316	22.8
71	Respondent - 71	Male	74	Wutete	49	4	7	yes	no	4	4	yes	yes	m/f/c	no	n/a	340	no	n/a	n/a	240	61.8182	120	181.2	0.662252	45.3
72	Respondent - 72	Female	71	Wutete	15	4	5	no	no	2	1	yes	yes	m/f/c	no	n/a		n/a	n/a	n/a
73	Respondent - 73	Male	42	Wutete	45	10	4	no	yes	2	1.5	yes	yes	f	yes	m/f	1146	yes	1146	7	300	208.364	150	356.28	0.421017	237.52
74	Respondent - 74	Female	38	Wutete	15	8	7	yes	yes	2.5	1.5	yes	yes	m	yes	m/f	400	yes	400	9	500	72.7273	250	322	0.776398	214.667
75	Respondent - 75	Male	62	Wutete	24	8	12	no	no	0.5	0.5	yes	yes	m/f/c	no	n/a	995	yes	995	7	200	180.909	100	279.1	0.358295	558.2
76	Respondent - 76	Male	68	Wutete	46	8	5	no	yes	5	3	yes	yes	m	yes	m/f	1565.5	yes	1565.5	7	1250	284.636	625	906.79	0.689244	302.263
77	Respondent - 77	Male	75	Wutete	14	4	6	yes	no	2.5	1	yes	yes	f	yes	m/f	173	yes	173	6	113	31.4545	56.5	87.64	0.644683	87.64
78	Respondent - 78	Male	46	Wutete	15	8	15	yes	yes			yes	yes	m/f/c	yes	m/f	928	yes	928	5	330	168.727	165	332.04	0.496928
79	Respondent - 79	Male	78	Wutete	17	4	10	yes	no	10	8	yes	yes	m/f	no	n/a	800	yes	800	7	60	145.455	30	174	0.172414	21.75
80	Respondent - 80	Male		Wutete	17	8	6	yes	yes	3	1	yes	yes	m/c	yes	m/f	520	yes	520	6	300	94.5455	150	243.6	0.615764	243.6
81	Respondent - 81	Female	45	Wutete	11	8	5	yes	yes	1.5	1	yes	yes	m/f	yes	m/f	1000	yes	1000	6	500	181.818	250	430	0.581395	430
82	Respondent - 82	Male	52	Wutete	13	8	7	yes	yes	2	1	yes	yes	f	no	n/a		n/a	n/a	n/a						0
83	Respondent - 83	Male	57	Wutete	14	None	10	yes	no	1	1	yes	yes	m/f	yes	f	324	yes	324	6	65	58.9091	32.5	90.82	0.357851	90.82
84	Respondent - 84	Male	26	Wutete	8	4	4	yes	yes	2	1	yes	yes	f	yes	m/f	200	yes	200		0	36.3636	0	36	0	36
85	Respondent - 85	male	61	Achibo	47	None	7		no	1	1	YES	YES	M/F	yes	M/F	150		150	6	300	27.2727	150	177	0.847458	177
86	Respondent - 86	male		Achibo	46	None	2		no	0.5	0.5	YES	YES	M/F	yes	M/F	1080		1080	8	100	196.364	50	244.4	0.204583	488.8
87	Respondent - 87	male	58	Achibo	21	4	6	yes	yes	0.5	0.5	YES	YES	M/F	yes	M/F/C	100		100	8	120	18.1818	60	78	0.769231	156
88	Respondent - 88	male	42	Achibo	13	4	4	yes	yes	2	0.45	YES	YES	M/F	yes	M									#DIV/0!
89	Respondent - 89	male	33	Achibo	11	8	4	no	yes	1.5	1	YES	YES	F	yes	M	325		325	8	600	59.0909	300	358.5	0.83682	358.5
90	Respondent - 90	male	42	Achibo	14	None	6	yes	yes	3	2.5	YES	YES	M/F	no	n/a	500		500	7	600	90.9091	300	390	0.769231	156
91	Respondent - 91	male	45	Achibo	14	8	6	yes	yes	4	3.5	YES	YES	M	yes	M	320		320	7	400	58.1818	200	257.6	0.776398	73.6
92	Respondent - 92	male	58	Achibo	33	8	9	yes	yes	2.5	2	YES	YES	M/F	yes	M/F	30		30	7	600	5.45455	300	305.4	0.982318	152.7
93	Respondent - 93	male	74	Achibo	47	None	not answered	not answered	no	2	2	YES	YES	M/F	yes	M/F	400		400	8	120	72.7273	60	132	0.454545	66
94	Respondent - 94	male	72	Achibo	47	8	4	n/a	yes	2	1	YES	YES	M/F	yes	M/F	200		200		110	36.3636	55	91	0.604396	91
95	Respondent - 95	male	43	Achibo	16	4	4	yes	yes	1	1	YES	YES	M/F	yes	M/F	0		n/a	n/a	4	0	2	2	1	2
96	Respondent - 96	male	72	Achibo	47	4	1	n/a	no	0.5	0.5	YES	YES	M/F	yes	M/F	80		80	8	250	14.5455	125	139.4	0.8967	278.8
97	Respondent - 97	male	73	Achibo	47	4	6	yes	no	2	1	YES	YES	M/F	yes	M/F	120		120	8	150	21.8182	75	96.6	0.776398	96.6
98	Respondent - 98	male	32	Achibo	47	None	2	n/a	no	1	1	YES	YES	M	no	n/a	150		150	8	150	27.2727	75	102	0.735294	102
99	Respondent - 99	male	64	Achibo	46	10	7	yes	yes	2	2	YES	YES	M/F	yes	M/F	700		700	8	120	127.273	60	186	0.322581	93
100	Respondent - 100	male	66	Achibo	47	None	3	n/a	no	0.5	0.5	YES	YES	M/F	yes	M/F	40		40	8	150	7.27273	75	82.2	0.912409	164.4
101	Respondent - 101	male	31	Achibo	13	None	5	yes	no	3	2	YES	YES	M/F	yes	M/F	0		0	n/a	250	0	125	125	1	62.5
102	Respondent - 102	male	62	Achibo	47	None	6	yes	no	0.5	0.5	YES	YES	M/F	yes	M/F	60		60	8	100	10.9091	50	60.8	0.822368	121.6
103	Respondent - 103	male	73	Achibo	47	8	3	n/a	yes	1	1	YES	YES	M/F	yes	M/F/C	500		500	8	150	90.9091	75	165	0.454545	165
104	Respondent - 104	male	41	Achibo	35	8	4	yes	yes	1	1	YES	YES	M/F	yes	M/F	98		98	8	120	17.8182	60	77.64	0.772798	77.64
105	Respondent - 105	male	111	Achibo	47	4	10	yes	yes	3	2	YES	YES	M/F	yes	M/F/C	500		500	8	500	90.9091	250	340	0.735294	170
106	Respondent - 106	male	82	Achibo	47	None	5	yes	no	0.5	0.5	YES	YES	M/F	yes	M/F/C	20		20	8	150	3.63636	75	78.6	0.954198	157.2
107	Respondent - 107	male	41	Achibo	42	4	5	yes	yes	0.5	0.5	YES	YES	M/F	yes	M/F/C	40		40	7	150	7.27273	75	82.2	0.912409	164.4
108	Respondent - 108	male	69	Achibo	47	None	2	n/a	no	3	2	YES	YES	M/F	yes	M/F	200		200	8	250	36.3636	125	161	0.776398	80.5
109	Respondent - 109	male	52	Achibo		8	6	yes	no	1	0.5	YES	YES	M/F	no	n/a	100		100	8	0	18.1818	0	18	0	36
110	Respondent - 110	male	52	Achibo	15	10	6	yes	yes	2	2	yes	yes	M/F/C	Yes	M/F	1000		1000	7	200	181.818	100	280	0.357143	140
111	Respondent - 111	male	52	Achibo	14	8	6	no	yes	2	1	yes	yes	M/F/C	Yes	M/F	150		150	7.5	500	27.2727	250	277	0.902527	277
112	Respondent - 112	male	44	Achibo	30	8	6	yes	no	1.5	1.5	yes	yes	M/F/C	No	n/a	250		250	6	200	45.4545	100	145	0.689655	96.6667
113	Respondent - 113	male	40	Achibo	14	4	4	no	yes	2	2	yes	yes	M/F	Yes	M/C	300		Not answered	8	1200	54.5455	600	654	0.917431	327
114	Respondent - 114	male	64	Achibo	47	4	8	yes	no	2	2	yes	yes	M	Yes	M/F/C									#DIV/0!
115	Respondent - 115	male	62	Achibo	37	None	6	yes	no	3	2	yes	yes	M/F/C	Yes	M/F/C	460		460	8	120	83.6364	60	142.8	0.420168	71.4
116	Respondent - 116	male	42	Achibo		8	6		yes	1	1	yes	yes	M/F	yes	M/F	40		40	8	80	7.27273	40	47.2	0.847458	47.2
117	Respondent - 117	male	48	Achibo	16	4	6	yes	yes	0.5	0.5	yes	yes	M/F	yes	M/F/C	200		200	8	250	36.3636	125	161	0.776398	322
118	Respondent - 118	male		Achibo	35		3	yes	no			yes	yes	M/F	yes	M/F/C									#DIV/0!
119	Respondent - 119	male	52	Achibo	25	8	5	yes	no	3	2	yes	yes	M/F	yes	M/F/C	50		50	8	300	9.09091	150	159	0.943396	79.5
120	Respondent - 120	male	64	Achibo	19	4	7	yes	yes	4	2	yes	yes	M/F/C	yes	M/F	10000		10000	8	1200	1818.18	600	2400	0.25	1200
121	Respondent - 121	male	34	Achibo	12	10	not answered		yes											8					#DIV/0!
122	Respondent - 122	male	31	Achibo	17	10	4	yes	yes	0.5	0.4	yes	yes	M/F	yes	M/F/C	100		100	8	2500	18.1818	1250	1268	0.985804	3170
123	Respondent - 123	male	69	Achibo	20	8	6	yes	yes	3	2	yes	yes	M/F/C	yes	M/F/C	180		180	8	250	32.7273	125	157.4	0.794155	78.7
124	Respondent - 124	male	54	Achibo		8	6	yes	no	1	1	yes	yes	M/F	yes	M/F/C	100		100	8	0	18.1818	0	18.1818	0	18.1818
125	Respondent - 125	male	68	Achibo		4	not answered		no	2	2	yes	yes	M/F/C	yes	M/F	500		500	7	380	90.9091	190	280	0.678571	140
126	Respondent - 126	male	52	Achibo	25	4	5	yes	yes	2	2	yes	yes	M/F/C	yes	M/F/C	150		150	8	250	27.2727	125	152	0.822368	76
127	Respondent - 127	female	56	Achibo	14	4	5	yes	yes	2	2	yes	yes	M/F/C	yes	M/F/C					500				#DIV/0!
128	Respondent - 128	male	46	Achibo	17	4	6	yes	yes	0.625	0.625	yes	yes	M/F/C	yes	M	40		40	8	600	7.27273	300	307.2	0.976562	491.52
129	Respondent - 129	female	46	Achibo	19	4	7	yes	no	2	1.5	yes	yes	M/F/C	no	n/a	36		36	8	75	6.54545	37.5	43.98	0.85266	29.32
130	Respondent - 130	male	48	Achibo	18	12	4	yes	yes	1.5	1.25	yes	yes	M/F/C	yes	M	80		80	8	480	14.5455	240	254.4	0.943396	203.52
131	Respondent - 131	male	57	Achibo	13	4	4	yes	no	0.5	0.5	yes	yes	M/F	yes	M/F	100		100	7.5	220	18.1818	110	128	0.859375	256
132	Respondent - 132	male	46	Achibo	11	8	5	yes	yes	4	3.5	yes	yes	M/F	yes	M/F	2000		2000	7	3000	363.636	1500	1860	0.806452	531.429
133	Respondent - 133	male	42	Achibo	13	8	2	n/a	yes	1	0.5	no	yes	F	yes	M/F	2400		2400	10	70	436.364	35	467	0.0749465	934
134	Respondent - 134	male	58	Achibo		8	5	yes	no	2	2	yes	yes	M/F/C	yes	M/F/C	120		120	8	150	21.8182	75	96.6	0.776398	48.3
135	Respondent - 135	female	45	Achibo	30	4	7	yes	yes	3	3	yes	yes	M/F/C	yes	M/F	300		300	8	600	54.5455	300	354	0.847458	118
136	Respondent - 136	male		Achibo	20	4	5	yes	yes	2	2	yes	yes	M/F	yes	M/F/C	100		100	8	300	18.1818	150	168	0.892857	84
137	Respondent - 137	male	40	Achibo	47	None	6	yes	no	2	0.5	yes	yes	M	no	n/a	80		80	7.5	400	14.5455	200	214.4	0.932836	428.8
138	Respondent - 138	male		Achibo	19	None	3	n/a	no	0.5	0.5	yes	yes	F	yes	M/F	50		50	8	50	9.09091	25	34	0.735294	68
139	Respondent - 139	male	84	Achibo		None	4	n/a	no	3	2	yes	yes	M/F	yes	M/F	14		14	8	250	2.54545	125	127.52	0.980238	63.76
140	Respondent - 140	female	52	Achibo	39	None	5	no	yes	2	0.625	yes	yes	M/F	yes	M/F	200		200	8	350	36.3636	175	211	0.829384	337.6
141	Respondent - 141	male	63	Achibo	14	8	5	yes	no	3	3	yes	yes	M/F/C	no	n/a	110		110	8	150	20	75	94.8	0.791139	31.6
142	Respondent - 142	male	76	Achibo	46	8	4	no	yes	3	2	yes	yes	M/F	yes	M/F	500		500	8	2000	90.9091	1000	1090	0.917431	545
143	Respondent - 143	male	60	Achibo	47	8	7	no	yes	3	2.5	yes	yes	M/F	yes	M/F	100		100	8	360	18.1818	180	198	0.909091	79.2
144	Respondent - 144	male	51	Achibo	20	12	4	yes	yes	1.5	1	yes	yes	M/C	yes	M/F/C	40		40	8	120	7.27273	60	67.2	0.892857	67.2
145	Respondent - 145	male	67	Achibo	47	None	2	n/a	no	2	2	yes	yes	M/F	yes	M/F	100		100	8	200	18.1818	100	118	0.847458	59
146	Respondent - 146	male	53	Achibo	19	8	8	yes	yes	6	4	yes	yes	M/F/C	yes	M/F	8000		4000	8.5	0	1454.55	0	1440	0	360
147	Respondent - 147	male	56	Geri	19	12	5	no	yes	10	10	yes	yes	m/f	yes	m	1300	yes	1300	7	10000	236.364	5000	5234	0.955292	523.4
148	Respondent - 148	male		Geri	19	4	4	yes	yes	1	1	yes	yes	f	yes	m/f	200	yes	200		600	36.3636	300	336	0.892857	336
149	Respondent - 149	male	42	Geri		4	4	yes	no		0.4	yes	yes	m/f	yes	m	200	yes	200	6	150	36.3636	75	111	0.675676	277.5
150	Respondent - 150	male		Geri	19	8	5	yes	no	1.5	0.5	yes	yes	m/f	no	n/a	300	yes	300		300	54.5455	150	204	0.735294	408
151	Respondent - 151	male		Geri		4				2.25	1.5	yes	yes	m	yes	m	1200	yes	1200		1000	218.182	500	716	0.698324	477.333
152	Respondent - 152	male		Geri	19	4	3	no	no	2	1	yes	yes	m/f	yes	m	300	yes	300		300	54.5455	150	204	0.735294	204
153	Respondent - 153	male	48	Geri	10	10	5	no	yes	3	1	yes	yes	m/f	yes	m/f	3700	yes	3700		300	672.727	150	816	0.183824	816
154	Respondent - 154	female	42	Geri	11	8	6	yes	no	6	6	yes	yes	m/f	yes	m	300	yes	300		300	54.5455	150	204	0.735294	34
155	Respondent - 155	male	47	Geri	19	10	6	yes	no	6	6	yes	yes	m/f	yes	m	300	yes	300		1200	54.5455	600	654	0.917431	109
156	Respondent - 156	male		Geri	9	8	8	yes	yes	2	0.625	yes	yes	m/f	yes	m/f	400	yes	400	6	400	72.7273	200	272	0.735294	435.2
157	Respondent - 157	male	55	Geri	19	12	3	n/a	no	2	1	yes	yes	m/f/c	yes	m	500	yes	250	6.5	300	90.9091	150	240	0.625	240
158	Respondent - 158	female	52	Geri	22	4	4	yes	no	4	3	yes	yes	m	yes	m	500	yes	500	5	720	90.9091	360	450	0.8	150
159	Respondent - 159	female	52	Geri	19	4	6	yes	no	4	3	yes	yes	m	yes	m	1000	yes	1000	don't remember	420	181.818	210	390	0.538462	130
160	Respondent - 160	female	67	Geri	19	None	6	yes	no	3	2	yes	yes	m/f	yes	m	3000	yes	3000	don't remember	3000	545.455	1500	2040	0.735294	1020
161	Respondent - 161	female	52	Geri	19	4	7	yes	no	3	2.5	yes	yes	m	no	n/a	1000	yes	1000	5	300	181.818	150	330	0.454545	132
162	Respondent - 162	female	57	Geri	11	10	7	yes	no	2	2	yes	yes	m/f	yes	m	1200	yes	1200	5	600	218.182	300	516	0.581395	258
163	Respondent - 163	female	45	Geri	19	4	7	yes	no	3	2.5	yes	yes	m	yes	f	600	yes	100	4	600	109.091	300	408	0.735294	163.2
164	Respondent - 164	male	67	Geri	19	12	5	yes	no	2	1	yes	yes	m/f	yes	m	1200	yes	1000	7	1200	218.182	600	816	0.735294	816
165	Respondent - 165	male	62	Geri	23	12	5	yes	yes	1	0.5	yes	yes	m/f	yes	m/f	280	yes	280	don't remember	500	50.9091	250	300.4	0.832224	600.8
166	Respondent - 166	male	53	Geri	19	8	5	yes	no	1	0.5	yes	yes	f	yes	m/f	200	yes	200	don't remember	300	36.3636	150	186	0.806452	372
167	Respondent - 167	male	37	Geri	19	10	2	n/a	yes	1.5	1.5	yes	yes	m	yes	m	1000	yes	1000	6	1500	181.818	750	930	0.806452	620
168	Respondent - 168	male	46	Geri	14	10	5	yes	yes	5.2	1.5	yes	yes	m/f	yes	m	500	yes	500	6	300	90.9091	150	240	0.625	160
169	Respondent - 169	male	83	Geri	19	4	2	n/a	no	1	1	yes	yes	f	yes	m/f	500	yes	500	6	280	90.9091	140	230	0.608696	230
170	Respondent - 170	male	67	Geri	19	8	8	yes	no	2.5	2.5	yes	yes	m	yes	m	300	yes	300	7	600	54.5455	300	354	0.847458	141.6
171	Respondent - 171	male	88	Geri	19	4	2	n/a	no	1	0.5	yes	no	n/a	yes	m/f	300	yes	300	don't remember	200	54.5455	100	154	0.649351	308
172	Respondent - 172	female	31	Geri	12	4	5	yes	no	2	1	yes	yes	m/f	yes	m/f	200	yes	300	don't remember	300	36.3636	150	186	0.806452	186
173	Respondent - 173	male	65	Geri	14	4	4	n/a	no	1.5	0.5	yes	yes	m	yes	m	300	yes	300	6	130	54.5455	65	119	0.546218	238
174	Respondent - 174	male	33	Geri	14	10	3	n/a	yes	4	1	yes	yes	m/f	yes	m	600	yes	600	6	500	109.091	250	358	0.698324	358
175	Respondent - 175	male	37	Geri	14	10	3	yes	yes	0.5	0.5	yes	yes	m/c	yes	m	600	yes	600	6	100	109.091	50	158	0.316456	316
176	Respondent - 176	male	41	Geri	19	4	5	yes	no	0.5	0.25	yes	yes	m	yes	m/f	100	yes	100	6	300	18.1818	150	168	0.892857	672
177	Respondent - 177	male	67	Geri	19	8	2	n/a	no	2.5	1.5	yes	no	n/a	yes	m	300	yes	300	6	500	54.5455	250	304	0.822368	202.667
178	Respondent - 178	female		Geri	14	4	6	yes	no	1.5	1.5	yes	yes	m/c	no	n/a	200	yes	200	6	500	36.3636	250	286	0.874126	190.667
179	Respondent - 179	male	79	Geri	11	none	5	yes	no	3	2	yes	no	n/a	yes	m	240	yes	240	6	240	43.6364	120	163.2	0.735294	81.6
180	Respondent - 180	male	62	Geri	11	8	10	yes	yes	3.5	3.5	yes	yes	m	yes	m/f	500	yes	200	don't remember	600	90.9091	300	390	0.769231	111.429
181	Respondent - 181	female	47	Geri	19	8	5	yes	yes	3.5	3	yes	yes	m/f	yes	m/f	400	yes	400	5	3600	72.7273	1800	1872	0.961538	624
182	Respondent - 182	male	66	Geri	20	none	7	yes	no	3	2	yes	yes	m/f	yes	m/f	1000	yes	10000	6	240	181.818	120	300	0.4	150
183	Respondent - 183	male	61	Geri	20	8	6	yes	no	2	2	yes	yes	m	yes	m/f	430	yes	430	don't remember	300	78.1818	150	227.4	0.659631	113.7
184	Respondent - 184	male	51	Geri	19	12	6	yes	yes	4	2	yes	yes	m	yes	m	3500	yes	1500	don't remember	3000	636.364	1500	2130	0.704225	1065
185	Respondent - 185	male	41	Geri		8	6	yes	yes	0.6	0.6	yes	yes	m/f	yes	m/f	50	yes	50	don't remember	120	9.09091	60	69	0.869565	115
186	Respondent - 186	male	63	Geri	20	10	7	yes	yes	18	17	yes	yes	m/f	yes	m/f	1500	yes	1500	6	4800	272.727	2400	2670	0.898876	157.059
187	Respondent - 187	male	46	Geri	11	Above	5	yes	yes	3	2	yes	yes	f	yes	m/f	250	yes	250	6	120	45.4545	60	105	0.571429	52.5
188	Respondent - 188	male	54	Geri	20	8	9	yes	no	6	6	yes	yes	m/f	yes	m/f	300	yes	300	5	1800	54.5455	900	954	0.943396	159
189	Respondent - 189	male	76	Geri	20	8	8	yes	no	5.25	5	yes	yes	m/f	yes	m/f	100	yes	100	5	2400	18.1818	1200	1218	0.985222	243.6
190	Respondent - 190	male	64	Geri	35	8	10	yes	no	4	3	yes	yes	m/f	yes	m/f	3000	yes	3000	5.5	1200	545.455	600	1140	0.526316	380
191	Respondent - 191	male	36	Geri	19	10	4	yes	yes	1	1	yes	yes	m/f	yes	m/f	500	yes	500	don't remember	900	90.9091	450	540	0.833333	540
192	Respondent - 192	male	73	Geri	19	4	5	yes	yes	1	0.5	yes	yes	f	no	n/a	1500	yes	350	don't remember	200	272.727	100	370	0.27027	740
193	Respondent - 193	male	42	Geri	13	4	5	yes	yes	3	1	yes	yes	f	no	n/a	2000	yes	300	don't remember	1000	363.636	500	860	0.581395	860
194	Respondent - 194	male	46	Geri	19	4	5	yes	no	4	1	yes	yes	m	no	n/a	1500	yes	400	don't remember	500	272.727	250	520	0.480769	520
195	Respondent - 195	male	68	Geri	19	8	10	yes	no	4	1	yes	yes	m	no	n/a	300	yes	150	don't remember	100	54.5455	50	104	0.480769	104
196	Respondent - 196	male	53	Geri	19	10	5	yes	no	2	2	yes	yes	m	no	n/a	2000	yes	500	don't remember	350	363.636	175	535	0.327103	267.5
197	Respondent - 197	male	49	Geri	19	10	7	yes	yes	5	2	yes	yes	m	no	n/a	1300	yes	500	don't remember	3000	236.364	1500	1734	0.865052	867
198	Respondent - 198	male	56	Geri	20	10	4	n/a	yes	1.5	0.3	yes	yes	m	yes	m/f	700	yes	200	don't remember	700	127.273	350	476	0.735294	1586.67
199	Respondent - 199	male	36	Geri	20	8	3	yes	yes	1	1	yes	yes	f	yes	m/f	128	yes	128	6	400	23.2727	200	223.04	0.8967	223.04
200	Respondent - 200	male	46	Geri	27	8	3	yes	yes	8	8	yes	yes	f	yes	m	900	yes	500	don't remember	900	163.636	450	612	0.735294	76.5
201	Respondent - 201	male	54	Geri	19	8	6	yes	no	4	2	yes	yes	m	no	n/a	2000	yes	226	6	1500	363.636	750	1110	0.675676	555
202	Respondent - 202	male	46	Geri	19	12	6	no	yes	5	5	yes	yes	m	no	n/a	3000	yes	1000	6	2000	545.455	1000	1540	0.649351	308
203	Respondent - 203	Male	68	Getschi	14	None	8		Yes	1.5	0.5	YES	YES	M			117		117	6	120	21.2727	60	81.06	0.740192	162.12
204	Respondent - 204	Male	48	Getschi	14	10	3		Yes	1	1	YES	YES	F			50		50		0	9.09091	0	9	0	9
205	Respondent - 205	Male	32	Getschi	12	10	2		Yes	0.5	0.5	YES	YES	M			120		120	6	120	21.8182	60	81.6	0.735294	163.2
206	Respondent - 206	Male	66	Getschi	14	None	9		No	1.5	1.5	YES	YES	M/F			100		100	6	120	18.1818	60	78	0.769231	52
207	Respondent - 207	Male	74	Getschi	10	None	4		Yes	1	0.5	YES	YES	M			20		20	6	60	3.63636	30	33.6	0.892857	67.2
208	Respondent - 208	Male	43	Getschi	14	8	5		Yes	3	3	YES	YES	M/F			0		0		4000	0	2000	2000	1	666.667
209	Respondent - 209	Male	58	Getschi	14	8	8		Yes	2	2	YES	YES	M/F			100		100	6	600	18.1818	300	318	0.943396	159
210	Respondent - 210	Male	38	Getschi	14	8	4		Yes	1.5	0.5	YES	YES	M/F			144		144	5	2400	26.1818	1200	1225.92	0.978857	2451.84
211	Respondent - 211	Female	56	Getschi	14	4	10		No	2	1.5	YES	YES	M			100		100	5	100	18.1818	50	68	0.735294	45.3333
212	Respondent - 212	Male	33	Getschi	14	12	3		Yes	0.5	0.5	YES	YES	M			400		400	5	900	72.7273	450	522	0.862069	1044
213	Respondent - 213	Male	51	Getschi	12	None	9		No	1.5	0.5	YES	YES	M/F			100		100	6	180	18.1818	90	108	0.833333	216
214	Respondent - 214	Male	66	Getschi	14	None	8		No	2	1.5	YES	YES	M			300		300	6	950	54.5455	475	529	0.897921	352.667
215	Respondent - 215	Male	77	Getschi	14	None	4		No	4	2	YES	YES	M/F			12		12	6	360	2.18182	180	182.16	0.988142	91.08
216	Respondent - 216	Female	68	Getschi	27	None	7		No	1	1	YES	YES	M			300		300	6	280	54.5455	140	194	0.721649	194
217	Respondent - 217	Male	68	Getschi	13	10	6		No	2	1.5	YES	YES	M			150		150	6	120	27.2727	60	87	0.689655	58
218	Respondent - 218	Male	58	Getschi	30	None	7		Yes	2.5	2	YES	YES	M/F			350		350	6	1800	63.6364	900	963	0.934579	481.5
219	Respondent - 219	Male	61	Getschi	30	8	8		Yes	2	1	YES	YES	M/F			300		300	6	180	54.5455	90	144	0.625	144
220	Respondent - 220	Male	81	Getschi	24	None	4		No	2.5	1.5	YES	YES	M			500		500	6	180	90.9091	90	180	0.5	120
221	Respondent - 221	Male	39	Getschi	14	10	10		Yes	1	1	YES	YES	M			300		300	6	0	54.5455	0	54	0	54
222	Respondent - 222	Male	60	Getschi	19	8	4		Yes	1.5	1	YES	YES	M/F			200		200	5	400	36.3636	200	236	0.847458	236
223	Respondent - 223	Male	73	Getschi	27	None	8		No	2	2	YES	YES	M/F			100		100	5	120	18.1818	60	78	0.769231	39
224	Respondent - 224	Male	55	Getschi	14	8	7		Yes	4	3.5	YES	YES	M/F			220		220	6	400	40	200	239.6	0.834725	68.4571
225	Respondent - 225	Male	50	Getschi	14	7	4		Yes	0.5	0.5	YES	YES	M			295		295	6	60	53.6364	30	83.1	0.361011	166.2
226	Respondent - 226	Male	42	Getschi	17	9	5		Yes	0.5	0.5	YES	YES	M/F			295		295	6	300	53.6364	150	203.1	0.738552	406.2
227	Respondent - 227	Male	39	Getschi	14	9	4		Yes	1	1	YES	YES	M/F			0		0		1000	0	500	500	1	500
228	Respondent - 228	Male	37	Getschi	14	10	3		Yes	1	1	YES	NO				300		300	6	400	54.5455	200	254	0.787402	254
229	Respondent - 229	Male	50	Getschi	13	10	12		Yes	1	0.5	YES	YES	M/F			100		100	6	0	18.1818	0	18	0	36
230	Respondent - 230	Female	71	Getschi	15	8	8		Yes	1.5	0.5	YES	YES	M			100		100	6	300	18.1818	150	168	0.892857	336
231	Respondent - 231	Male	39	Getschi	15	10	3		Yes	5	5	YES	YES	M			500		500	6	1000	90.9091	500	590	0.847458	118
232	Respondent - 232	Male	38	Getschi	10	10	1		Yes	3	2	YES	YES	M/F			50		50	6	60	9.09091	30	39	0.769231	19.5
233	Respondent - 233	Male	57	Getschi	15	8	6		Yes	2.5	2	YES	YES	M/F			50		50	6	600	9.09091	300	309	0.970874	154.5
234	Respondent - 234	Male	51	Getschi	21	8	9		Yes	2	1	YES	YES	F			300		300	6	900	54.5455	450	504	0.892857	504
235	Respondent - 235	Male	52	Getschi	14	4	5		Yes	1	1	YES	YES	M			50		50	6	240	9.09091	120	129	0.930233	129
236	Respondent - 236	Female	50	Getschi	14	None	4		No	1	0.5	YES	YES	M/F			118		118	5	360	21.4545	180	201.24	0.894454	402.48
237	Respondent - 237	Male	62	Getschi	21	8	7		No	1.5	1	YES	YES	M/F			153		153	6	400	27.8182	200	227.54	0.878966	227.54
238	Respondent - 238	Male	63	Getschi	14	None	3		No	2.5	1.5	YES	YES	M/F			100		100	6	120	18.1818	60	78	0.769231	52
239	Respondent - 239	Male	46	Getschi	14	10	4		Yes	1.5	1	YES	YES	M/F			900		900	6	1200	163.636	600	762	0.787402	762
240	Respondent - 240	Female	34	Getschi	13	None	7		Yes	2	2	YES	YES	M/F			600		600	5	120	109.091	60	168	0.357143	84
241	Respondent - 241	Male	19	Getschi	15	10	4		Yes	0.5	0.5	YES	YES	M/F			360		360	5	180	65.4545	90	154.8	0.581395	309.6
242	Respondent - 242	Male	43	Getschi	12	8	4		Yes	0.5	0.5	YES	YES	M/F			95		95	6	300	17.2727	150	167.1	0.897666	334.2
243	Respondent - 243	Female	56	Getschi	15	None	5		No	2.5	1.5	YES	YES	M/F			85		85	6	400	15.4545	200	215.3	0.928936	143.533
244	Respondent - 244	Male	57	Yayu Zuria	14	8	9	Yes	Yes	3	3	Yes	Yes	M	Yes	M	4000	yes	4000	6-7.5	2400	727.273	1200	1920	0.625	640
245	Respondent - 245	Male	39	Yayu Zuria	27	8	6	n/a	Yes	3	1	Yes	Yes	M/F	Yes	M/F	300	yes	300	8	480	54.5455	240	294	0.816327	294
246	Respondent - 246	Male	87	Yayu Zuria	14	8	2	n/a	No	2	1	Yes	Yes	M	No	N/A	100	yes	100	don't remember	290	18.1818	145	163	0.889571	163
247	Respondent - 247	Male	72	Yayu Zuria	14	8	4	n/a	No	1	1	Yes	Yes	M	No	N/A	0	no	0	n/a	280	0	140	140	1	140
248	Respondent - 248	Male	77	Yayu Zuria	14	None	2	n/a	No	1	1	Yes	Yes	F	No	N/A	0	no	0	n/a	240	0	120	120	1	120
249	Respondent - 249	Female	97	Yayu Zuria	14	None	1	n/a	No	0.5	0.5	Yes	Yes	M	No	N/A	500	yes	500	8	750	90.9091	375	465	0.806452	930
250	Respondent - 250	Male	47	Yayu Zuria	14	8	5	Yes	No	0.5	0.5	Yes	Yes	M	No	N/A	0	n/a	n/a	n/a	100	0	50	50	1	100
251	Respondent - 251	Male	82	Yayu Zuria	14	8	2	n/a	No	1	1	Yes	Yes	F	No	N/A	0	n/a	n/a	n/a	220	0	110	110	1	110
252	Respondent - 252	Male	72	Yayu Zuria	14	None	5	Yes	No	0.5	0.5	Yes	Yes	M	No	N/A	0	n/a	n/a	n/a	160	0	80	80	1	160
253	Respondent - 253	Female	56	Yayu Zuria	14	8	0	n/a	No	1	1	Yes	Yes	?	Yes	M	0	n/a	n/a	n/a	300	0	150	150	1	150
254	Respondent - 254	Male	78	Yayu Zuria	12	8	5	no	No	1	1	Yes	Yes	F	No	N/A	0	n/a	n/a	n/a	220	0	110	110	1	110
255	Respondent - 255	Male	81	Yayu Zuria	19	4	3	yes	No	2	1	Yes	Yes	F/C	Yes	M	2000	yes	2000	6	600	363.636	300	660	0.454545	660
256	Respondent - 256	Male	57	Yayu Zuria	19	8	4	no	no	1	1	Yes	Yes	F	Yes	M	200	yes	200	don't remember	400	36.3636	200	236	0.847458	236
257	Respondent - 257	Male	81	Yayu Zuria	19	4	3	no	no	3	1	Yes	Yes	F	Yes	M	400	yes	400	don't remember	400	72.7273	200	272	0.735294	272
258	Respondent - 258	Male		Yayu Zuria	14	8	4	yes	no	2	1	Yes	Yes	M/C	No	N/A	400	yes	400	6	200	72.7273	100	172	0.581395	172
259	Respondent - 259	Male		Yayu Zuria	18	8	2	n/a	no	2.5	1.5	Yes	Yes	M	No	N/A	300	yes	300	6	0	54.5455	0	54	0	36
260	Respondent - 260	Male	58	Yayu Zuria	19	4	7	n/a	no	2	3	Yes	Yes	M/F	Yes	M	200	yes	200	don't remember	500	36.3636	250	286	0.874126	95.3333
261	Respondent - 261	Male	57	Yayu Zuria	14	8	4	yes	no	1	0.5	Yes	Yes	F	No	N/A	0	n/a	n/a	n/a	140	0	70	70	1	140
262	Respondent - 262	Male	63	Yayu Zuria	14	4	2	n/a	no	1	0.5	Yes	Yes	M	Yes	M	0	n/a	n/a	n/a	150	0	75	75	1	150
263	Respondent - 263	Male	76	Yayu Zuria	11	8	4	yes	no	3	1.5	Yes	Yes	F/C	Yes	M	100	yes	100	don't remember	1000	18.1818	500	518	0.965251	345.333
264	Respondent - 264	Male	67	Yayu Zuria	14	8	3	Yes	no	1	0.5	Yes	Yes	F	No	N/A	0	n/a	n/a	n/a	200	0	100	100	1	200
265	Respondent - 265	Male	69	Yayu Zuria		8	4	Yes	yes	1.5	1	Yes	Yes	M/F	No	N/A	0	no	n/a	n/a	300	0	150	150	1	150
266	Respondent - 266	Male	45	Yayu Zuria	14	8	4	Yes	No	2	1	Yes	Yes	M/F	No	N/A	0	no	n/a	n/a	240	0	120	120	1	120
267	Respondent - 267	Male	59	Yayu Zuria	19	4	5	Yes	No	2.5	1.5	Yes	Yes	M/F/C	No	N/A	0	no	n/a	8	240	0	120	120	1	80
268	Respondent - 268	Male	46	Yayu Zuria	15	8	5	Yes	No	1.5	1	Yes	Yes	F	Yes	M	0	no	n/a	n/a	500	0	250	250	1	250
269	Respondent - 269	Male	46	Yayu Zuria		None	4	No	No	2	1	Yes	Yes	F	Yes	M	200	yes	200	8	250	36.3636	125	161	0.776398	161
270	Respondent - 270	Male	51	Yayu Zuria	14	4	5	Yes	No	1	1	Yes	Yes	M/F	Yes	M	60	yes	60	don't remember	200	10.9091	100	110.8	0.902527	110.8
271	Respondent - 271	Male		Yayu Zuria	14	8	7	Yes	No	1	1	Yes	Yes	M/F	Yes	M	0	no	n/a	don't remember	4	0	2	2	1	2
272	Respondent - 272	Male	0	Yayu Zuria	14	8	6	Yes	No	1	1	Yes	Yes	M/F	Yes	M	0	n/a	n/a	n/a	200	0	100	100	1	100

## Sheet: Extra - question
	Name	Cooperative	A. Number of coffee tree	B. Another type of crop	C. Does your coffee have a problem	D. Do yo se chemical fertilizer?	E. Did the cooperative promotion visit your coffee farm	F. Oldest coffee tree?	G. Youngest coffee tree?	H. Do you prune your coffee?	I. Where did you get your plant material?	J. Variety?	K. When yo begin to harvest yor coffee	L. How do yo transport?
1	Respondent Extra Question - 1	Wutete	9000	No	No	No	No	12	4	yes	private	no	2009-10-15	Manal
2	Respondent Extra Question - 2	Wutete	6000	No	Yes	No	No	16		no	n/a	no		Manal
3	Respondent Extra Question - 3	Wutete	6000	No		No	No	10	8		Wutete nursury	No	2009-02-15	Donkey
4	Respondent Extra Question - 4	Wutete	4000	No		No	Yes (4 times)	5	10		Yayu nursury	Arabica		Manual
5	Respondent Extra Question - 5	Wutete	30000	No	No	No	Yes (once a year)	29	29		N/A		Don't know	Donkey and Manual
6	Respondent Extra Question - 6	Wutete	2000		No	No	Yes (once a year)	10	10		Yayu nursury		Don't know	Donkey and Manual
7	Respondent Extra Question - 7	Wutete	5000	No	Yes	No	No	21	16		Wutete nursury		Don't know	Manual
8	Respondent Extra Question - 8	Wutete	5000		Yes	No	No	15	10		Wutete nursury	Don't know	2009-02-10	Donkey
9	Respondent Extra Question - 9	Wutete	1000	Yes	Yes	No	No	18	8		Own nursury	Don't know	2009-02-20	Manual
10	Respondent Extra Question - 10	Wutete	9200	Yes	Yes (CBD)	No	Yes	20	5		Yayu nursury	Don't know	Don't know	Car
11	Respondent Extra Question - 11	Wutete	8000	Yes	No	No	Yes (once a year)	19	18		Wutete nursury	Don't know	November	Manual
12	Respondent Extra Question - 12	Wutete		No	No	No	Don't know	30	20		Wutete nursury		2009-02-25
13	Respondent Extra Question - 13	Wutete		Yes	No	No	No	10	7				2009-03-01
14	Respondent Extra Question - 14	Wutete		Yes	No	No	No	8	4		Own nursury		2009-03-01
15	Respondent Extra Question - 15	Wutete			No	No	Yes	19	9		Wutete nursury		30-02-2009
16	Respondent Extra Question - 16	Wutete		Yes	Yes (CBD)	No		25	12		Wutete nursury		2009-03-01
17	Respondent Extra Question - 17	Wutete		Yes		No	No	25	6		Wutete nursury		2009-03-05
18	Respondent Extra Question - 18	Wutete		Yes	No	No	No	25	25		N/A		2009-03-01
19	Respondent Extra Question - 19	Wutete	5000	No	Yes	No	Yes	10	2		Wutete nursury	Don't know	2009-02-19	Donkey
20	Respondent Extra Question - 20	Wutete			No	No	No	11	11		Wutete nursury
21	Respondent Extra Question - 21	Wutete	800	No	No	No	No	15	10		Wutete nursury		2009-02-26
22	Respondent Extra Question - 22	Wutete		Yes	Yes	No	No	20	8		Wutete nursury		2009-02-26
23	Respondent Extra Question - 23	Wutete		No	No	No	No	20	7	No	Wutete nursury		2009-02-23
24	Respondent Extra Question - 24	Wutete		Yes	Yes	No	No	10	2		Wutete nursury		2009-02-25
25	Respondent Extra Question - 25	Wutete		Yes	Yes (CBD)	No	No	20	7	Yes	Wutete nursury		2009-02-15
26	Respondent Extra Question - 26	Wutete		Yes	Yes (CBD)	No	No	30	10	Yes	Wutete nursury		2009-02-25
27	Respondent Extra Question - 27	Wutete		Yes		No	Yes	20	10	Yes	Wutete nursury		2009-02-25
28	Respondent Extra Question - 28	Wutete		Yes	Yes (CBD)	No	No	25	10		Wutete nursury		2009-02-25
29	Respondent Extra Question - 29	Wutete		Yes	Yes (CBD)	No		20	3		Own nursury		2009-02-15
30	Respondent Extra Question - 30	Wutete		Yes	Yes (CBD)	No		30	20		Birbiriin nursury		2009-02-15
31	Respondent Extra Question - 31	Wutete		Yes	Yes (CBD)	No	No	19	13		Wutete nursury		2009-02-25
32	Respondent Extra Question - 32	Wutete		Yes	No	No	No	12			Wutete nursury		2009-02-15
33	Respondent Extra Question - 33	Wutete		Yes	No	No	No	23	12				2009-02-03
34	Respondent Extra Question - 34	Wutete		Yes	No	No	No	20	10		Own nursury		2009-03-15
35	Respondent Extra Question - 35	Wutete		Yes	No	No	No	18	5	Yes	Wutete nursury		2009-02-25
36	Respondent Extra Question - 36	Wutete		Yes	Yes	No	No	20		Yes	Yayu nursury		2009-03-01
37	Respondent Extra Question - 37	Wutete		No	No	No	No	13	8
38	Respondent Extra Question - 38	Wutete		Yes	Yes	No	No	20			Wutete nursury		2009-03-10
39	Respondent Extra Question - 39	Wutete	1600	Yes	Yes	No	No	8	4	Yes	Agricultural nursury		2009-02-05	Manual and Donkey
40	Respondent Extra Question - 40	Wutete	1200	No	No	No	No	20	3	No	Agricultural nursury	Don't know		Manual
41	Respondent Extra Question - 41	Wutete	3000	Yes (honey chad)	Yes (CBD)	No	No	8	1	No		Don't know	2009-02-25	Manual
42	Respondent Extra Question - 42	Wutete	4500	Yes	No	No	Yes	23	12	Yes			2009-02-15	Manual
43	Respondent Extra Question - 43	Geri				no		20	10	yes
44	Respondent Extra Question - 44	Geri				no		7	4	no
45	Respondent Extra Question - 45	Geri				no		20	15	yes
46	Respondent Extra Question - 46	Geri				no		10	10	yes
47	Respondent Extra Question - 47	Geri				no		20	10	no
48	Respondent Extra Question - 48	Geri				no		20	10	no
49	Respondent Extra Question - 49	Geri				no		20	10	yes
50	Respondent Extra Question - 50	Geri				no		20	10	yes
51	Respondent Extra Question - 51	Geri				no		30	20	yes
52	Respondent Extra Question - 52	Geri				no		10	10	yes
53	Respondent Extra Question - 53	Geri				no		don't know	don't know	yes
54	Respondent Extra Question - 54	Geri				no		30	20	yes
55	Respondent Extra Question - 55	Geri				no		30	20	yes
56	Respondent Extra Question - 56	Geri				no		30	20	yes
57	Respondent Extra Question - 57	Geri				no		12	7	yes
58	Respondent Extra Question - 58	Geri				no		15	15	yes
59	Respondent Extra Question - 59	Geri				no		12	7	yes
60	Respondent Extra Question - 60	Geri				no		5	3	yes
61	Respondent Extra Question - 61	Geri				no		20	12	yes
62	Respondent Extra Question - 62	Geri				no		30	20	yes
63	Respondent Extra Question - 63	Geri				no		10	4	yes
64	Respondent Extra Question - 64	Geri				no		40	20	yes
65	Respondent Extra Question - 65	Geri				no		83	1	yes
66	Respondent Extra Question - 66	Geri				no		30	10	yes
67	Respondent Extra Question - 67	Geri				no		20	20	yes
68	Respondent Extra Question - 68	Geri				no		20	10	yes
69	Respondent Extra Question - 69	Geri				no		50	30	yes
70	Respondent Extra Question - 70	Geri				no		50	5	yes
71	Respondent Extra Question - 71	Geri				no		20	10	yes
72	Respondent Extra Question - 72	Geri				no		30	15	yes
73	Respondent Extra Question - 73	Geri				no		30	18	yes
74	Respondent Extra Question - 74	Geri				no		20	15	yes
75	Respondent Extra Question - 75	Geri				no		25	10	yes
76	Respondent Extra Question - 76	Geri				no		30	5	no
77	Respondent Extra Question - 77	Geri				no		15	10	no
78	Respondent Extra Question - 78	Geri				no		10	10	no
79	Respondent Extra Question - 79	Geri				no		80	35	yes
80	Respondent Extra Question - 80	Geri				no		20	10	yes
81	Respondent Extra Question - 81	Geri				no		20	7	yes
82	Respondent Extra Question - 82	Geri				no		25	3	yes
83	Respondent Extra Question - 83	Geri				no		10	10	no
84	Respondent Extra Question - 84	Geri				no		25	10	yes
85	Respondent Extra Question - 85	Geri				no		10	5	yes
86	Respondent Extra Question - 86	Geri				no		30	20	no
87	Respondent Extra Question - 87	Yayu Zuria				no	1	30		No
88	Respondent Extra Question - 88	Yayu Zuria				no	No	30		Yes
89	Respondent Extra Question - 89	Yayu Zuria				no	No	30		No
90	Respondent Extra Question - 90	Yayu Zuria				no	No	25		Yes
91	Respondent Extra Question - 91	Yayu Zuria				no	No	40		No
92	Respondent Extra Question - 92	Yayu Zuria				no	No	40		No
93	Respondent Extra Question - 93	Yayu Zuria				no	No	30		No
94	Respondent Extra Question - 94	Yayu Zuria				no	No	40		No
95	Respondent Extra Question - 95	Yayu Zuria				no	No	30		No
96	Respondent Extra Question - 96	Yayu Zuria				no	No	40		No
97	Respondent Extra Question - 97	Yayu Zuria				no	No	30		No
98	Respondent Extra Question - 98	Yayu Zuria				no	8	35		No
99	Respondent Extra Question - 99	Yayu Zuria				no	No	45		No
100	Respondent Extra Question - 100	Yayu Zuria				no	No	40		No
101	Respondent Extra Question - 101	Yayu Zuria				no	No	30		No
102	Respondent Extra Question - 102	Yayu Zuria				no	No	35		No
103	Respondent Extra Question - 103	Yayu Zuria				no	No	30		No
104	Respondent Extra Question - 104	Yayu Zuria				no	No	25		No
105	Respondent Extra Question - 105	Yayu Zuria				no	No	30		No
106	Respondent Extra Question - 106	Yayu Zuria				no	No	30		No
107	Respondent Extra Question - 107	Yayu Zuria				no	No	30		Yes
108	Respondent Extra Question - 108	Yayu Zuria				no	No	30		No
109	Respondent Extra Question - 109	Yayu Zuria				no	No	30		No
110	Respondent Extra Question - 110	Yayu Zuria				no	No	30		No
111	Respondent Extra Question - 111	Yayu Zuria				no	No	25		Yes
112	Respondent Extra Question - 112	Yayu Zuria				no	No	30		Yes
113	Respondent Extra Question - 113	Yayu Zuria				no	No	20		Yes
114	Respondent Extra Question - 114	Yayu Zuria				no	7	30		No
115	Respondent Extra Question - 115	Yayu Zuria				no	No	15		No
						115				35

## Sheet: PIVOT
Row Labels	Count of Name	Count of 20. how many kilo's of fresh cherries did you harvest in 2008?	Average of 22. How many kilo did you sell to the cooperative?
Achibo	62	57	532.055
Geri	56	56	793.821
Getschi	41	41	205.707
Wutete	84	74	511.674
Yayu Zuria	29	29	584
Grand Total	272	257	535.114
			429.04
