# Supplementary material for: The potential for income improvement and biodiversity conservation via specialty coffee in Ethiopia
Source: PeerJ journal article supplement (doi:10.7717/peerj.10621), 2021-02-09
Supplement: Yayu_Survey_English.pdf [file Yayu_Survey_English.pdf]

## Survey Yayu

Q1 Full name and surname \_\_\_\_\_

Q2 Identification number \_\_\_\_\_

Q3 Sex  Male  Female

Q4 Date of birth     
Day Month Year

Q5 Martital status  Married  Divorced  Single  Widow

Q6 Member of the cooperative since   
(Ethiopian Calender Year)

Q7 Highest school grade obtained  No education o  Primary (1-4)  Higher primary (5-8)  
 High school (9-10)  Preparatory (11-12)  Higher than prepator

Q8 How many people live in your household?  
(Are you responsible for)

Q9 How many children do you have that live in your household?

Q10 Do all children below 15 go to school?  Yes  No  N/A

Q11 Do one or more members of the household have a cell phone that works?  Yes  No

Q12 Phonenumner

Q13 How many hectares of land do you have?

Q14 How many hectares of coffee do you have?

Q15 Is coffee your most important source of income?

Yes

No

Q16 Does your family work on the farm?

Yes

No

Q17 If yes, which one?

Male

Female

Children under 15?

Q18 Do you use paid daily labour?

Yes

No

Q19 If yes, which one?

Male

Female

Children under 15?

Q20 How many kilo of red cherries did you harvest in 2015/16

Kilo

Q21 To whom did you sell the red cherries

Cooperative

Kilo

Average price?

Other

Kilo

Average price?

Q22 How many kilo's did you sundry?

Kilo

Q23 How do you dry your cherries?

Drying bed

On the ground

On the tree

Q24 Surveyor name

Q25

Date

Day

Month

Year

Signature

Signature of farmer
